# Supplementary material
Source: HighWire-hosted journal article supplement (https://www.haematologica.org/content/suppl/2019/01/07/haematol.2018.191841)
Supplement: 2018.191841.NIKTOREH_SUPPL.pdf [file 2018.191841.NIKTOREH_SUPPL.pdf]

## Gemtuzumab ozogamicin in children with relapsed or refractory acute myeloid leukemia: a report by Berlin-Frankfurt-Münster study group

Naghmeh Niktoreh,<sup>1\*</sup> Beate Lerijs,<sup>1\*</sup> Martin Zimmermann,<sup>2</sup> Bernd Gruhn,<sup>3</sup> Gabriele Escherich,<sup>4</sup> Jean-Pierre Bourquin,<sup>5</sup> Michael Dworzak,<sup>6</sup> Lucie Sramkova,<sup>7</sup> Claudia Rossig,<sup>8</sup> Ursula Creutzig,<sup>2</sup> Dirk Reinhardt<sup>1</sup> and Mareike Rasche<sup>1</sup>

<sup>1</sup>Department of Pediatric Hematology and Oncology, University Hospital Essen, Germany; <sup>2</sup>Department of Pediatric Hematology and Oncology, Hannover Medical School, Germany; <sup>3</sup>Department of Pediatrics, Jena University Hospital, Germany; <sup>4</sup>Department of Pediatric Hematology and Oncology, Eppendorf University Hospital, Hamburg, Germany; <sup>5</sup>Division of Pediatric Hematology/Oncology, University Children's Hospital Zurich, Switzerland; <sup>6</sup>St. Anna Children's Hospital and Children's Cancer Research Institute, Department of Pediatrics, Medical University of Vienna, Austria; <sup>7</sup>Department of Pediatric Hematology and Oncology, 2<sup>nd</sup> Faculty of Medicine, Charles University and University Hospital Motol, Prague, Czech Republic and <sup>8</sup>University Children's Hospital Münster, Pediatric Hematology and Oncology, Germany

*\*NN and BL contributed equally to this work as first authors.*

©2019 Ferrata Storti Foundation. This is an open-access paper. doi:10.3324/haematol.2018.191841

Received: February 23, 2018.

Accepted: August 3, 2018.

Pre-published: August 31, 2018.

Correspondence: mareike.rasche@uk-essen.de

---

**Table S1. Active Clinical trials with Gemtuzumab Ozogamicin Intervention Listed in ClinicalTrials.gov by September 2017**

| N | Title                                                                                                                                                                                                                                     | Study Type      | Phase  | Status     | TG                       | Target Disease Status                                                            | N    | Trial Number | Sponsor                                | Collaborator(s)                                                                                      |
|---|-------------------------------------------------------------------------------------------------------------------------------------------------------------------------------------------------------------------------------------------|-----------------|--------|------------|--------------------------|----------------------------------------------------------------------------------|------|--------------|----------------------------------------|------------------------------------------------------------------------------------------------------|
| 1 | International Randomised Phase III Clinical Trial in Children With Acute Myeloid Leukaemia (Myechild01)                                                                                                                                   | Interventional  | III    | Recruiting | Child                    | De-novo AML<br>MDS with ≥10%<br>Myeloblasts at Dx                                | 700  | NCT02724163  | University of Birmingham               | Assistance Publique - Hôpitaux de Paris, Cancer Research UK, National Cancer Institute, FRA., Pfizer |
| 2 | A Pilot Study of Gemtuzumab Ozogamicin in Combination With Busulfan and Cyclophosphamide (Immunochemotherapy) and Allogeneic Stem Cell Transplantation in Patients With High Risk Acute Myelogenous Leukemia and Myelodysplastic Syndrome | Interventional  | II     | Recruiting | Child<br>Adult           | Relapsed/Refractory AML<br>MDS with ≥ 6%<br>Myeloblasts at Dx                    | 25   | NCT02221310  | New York Medical College               | N/I                                                                                                  |
| 3 | Allogeneic Stem Cell Transplantation Following by Targeted Immune Therapy) (Gemtuzumab Ozogamicin) in Average Risk Acute Myelogenous Leukemia and Myelodysplastic Syndrome (AML/MDS)(IND 111024)                                          | Interventional  | II     | Recruiting | Child<br>Adult           | Relapsed/Refractory AML<br>MDS with ≥ 5%<br>Myeloblasts at Dx                    | 26   | NCT02117297  | New York Medical College               | N/I                                                                                                  |
| 4 | Acute Promyelocytic Leukemia (APL) Treated With ATRA, Arsenic Trioxide and Gemtuzumab Ozogamicin                                                                                                                                          | Interventional  | II     | Recruiting | Child<br>Adult<br>Senior | De-novo APL                                                                      | 100  | NCT01409161  | M.D. Anderson Cancer Center            | Pfizer                                                                                               |
| 5 | Expanded Access /Compassionate Use Protocol For Relapsed Or Refractory CD33 Positive AML Patients In The USA Without Access To Comparable Or Alternative Therapy                                                                          | Expanded Access | N/I    | Recruiting | Child<br>Adult<br>Senior | Relapsed/Refractory AML or APL                                                   | NA   | NCT02312037  | Pfizer                                 | N/I                                                                                                  |
| 6 | Gemtuzumab Ozogamicin in Treating Patients With Relapsed or Refractory Acute Myeloid Leukemia or Acute Promyelocytic Leukemia                                                                                                             | Interventional  | N/I    | Recruiting | Adult<br>Senior          | Relapsed/Refractory AML, biphenotypic acute leukemia, or APL                     | 30   | NCT01869803  | Wake Forest University Health Sciences | National Cancer Institute (NCI)                                                                      |
| 7 | Gemtuzumab Ozogamicin+Cytarabine vs Idarubicin+Cytarabine in Elderly Patients With AML.Mylofrance 4                                                                                                                                       | Interventional  | II/III | Recruiting | Adult<br>Senior          | De-novo AML                                                                      | 225  | NCT02473146  | Versailles Hospital                    | N/I                                                                                                  |
| 8 | Study of Chemotherapy in Combination With All-trans Retinoic Acid (ATRA) With or Without Gemtuzumab Ozogamicin in Patients With Acute Myeloid Leukemia (AML) and Mutant Nucleophosmin-1 (NPM1) Gene Mutation                              | Interventional  | II     | Recruiting | Adult<br>Senior          | De-novo AML                                                                      | 588  | NCT00893399  | University of Ulm                      | N/I                                                                                                  |
| 9 | Trial to Test the Effects of Adding 1 of 2 New Treatment Agents to Commonly Used Chemotherapy Combinations                                                                                                                                | Interventional  | III    | Recruiting | Adult<br>Senior          | De-novo primary or secondary AML MDS with ≥ 10% Myeloblasts at initial diagnosis | 1600 | NCT02272478  | Cardiff University                     | Cancer Research UK                                                                                   |

Abbreviations: TG, target group; N, number of patients; N/I, not indicate; MDS, myelodysplastic syndrome; APL, acute promyelocytic leukemia; FRA, France; UK, United Kingdom of Great Britain.

**A**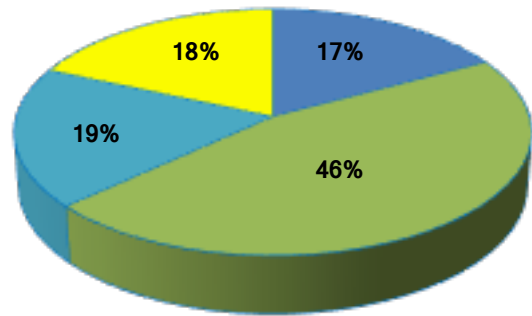

■ 2nd treatment attempt      ■ 3rd treatment attempt  
■ 4th treatment attempt      ■ ≥ 5th treatment attempt

**B**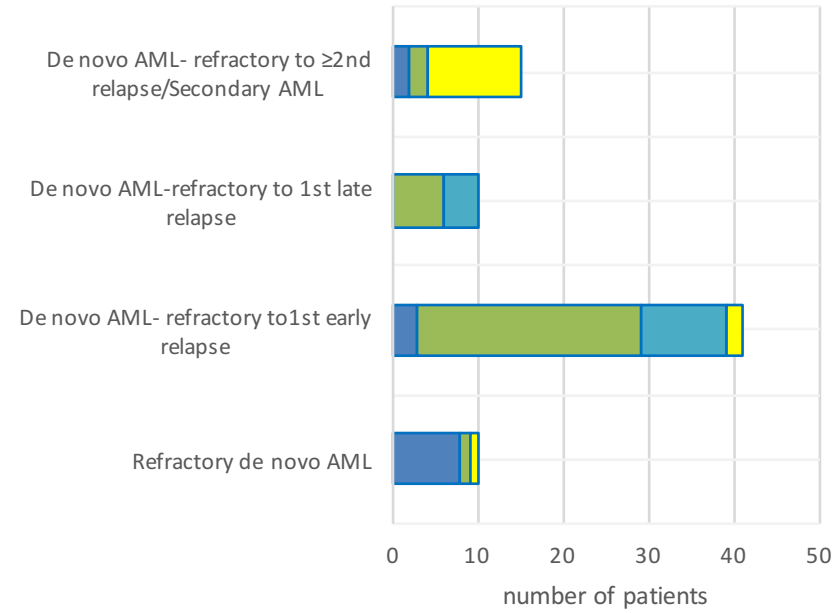

■ 2nd treatment attempt      ■ 3rd treatment attempt  
■ 4th treatment attempt      ■ ≥ 5th treatment attempt

**Figure S1. (A)** Distribution Rank of treatment with Gemtuzumab Ozogamicin in the total cohort. **(B)** Rank of treatment with Gemtuzumab Ozogamicin in different groups of patients.

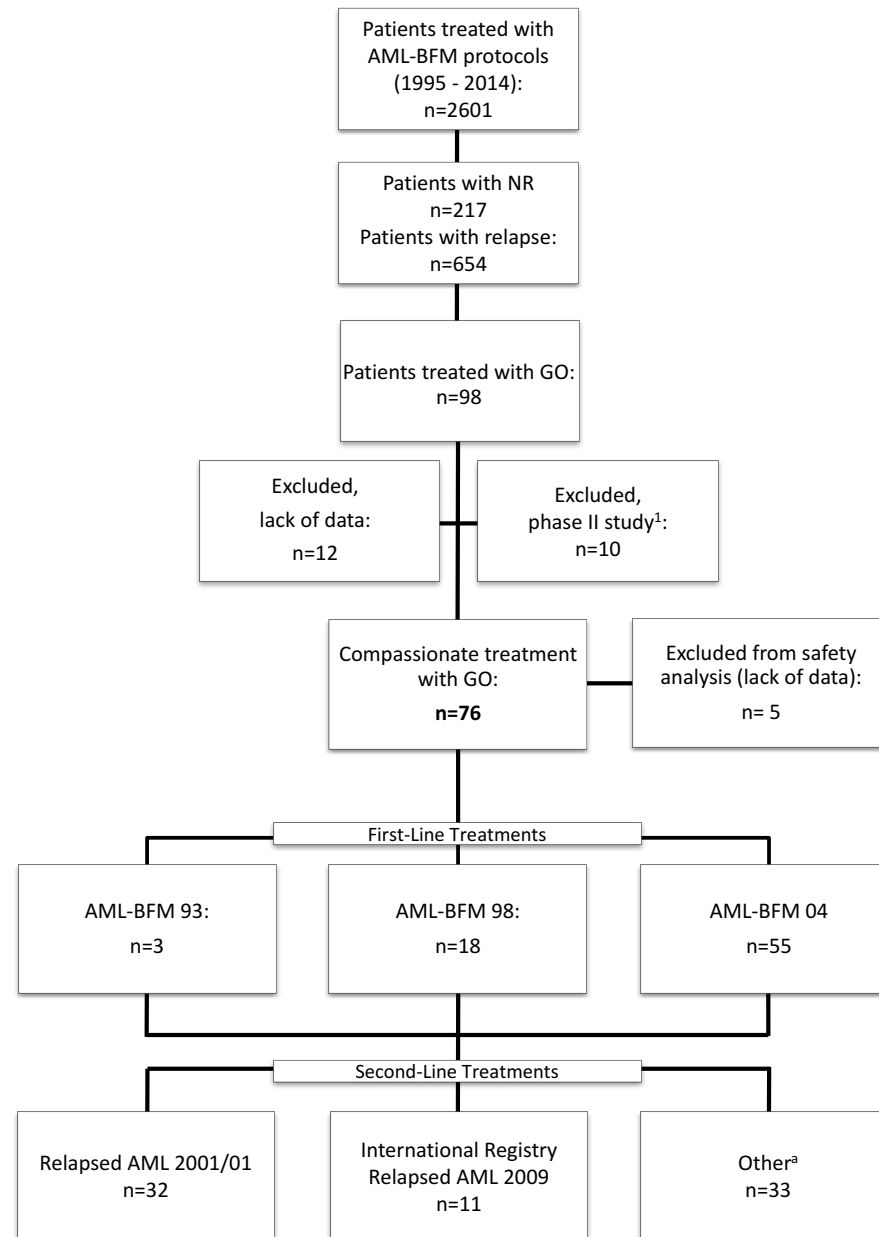

**Figure S2. Flow chart of the study design and first/second line treatments before administration of Gemtuzumab Ozogamicine.** Abbreviations: n, number of patients; AML, acute myeloid leukemia; BFM, Berlin-Frankfurt-Münster; NR, non-response; GO, Gemtuzumab Ozogamicin. <sup>a</sup>Patients were treated with diverse treatment attempts.

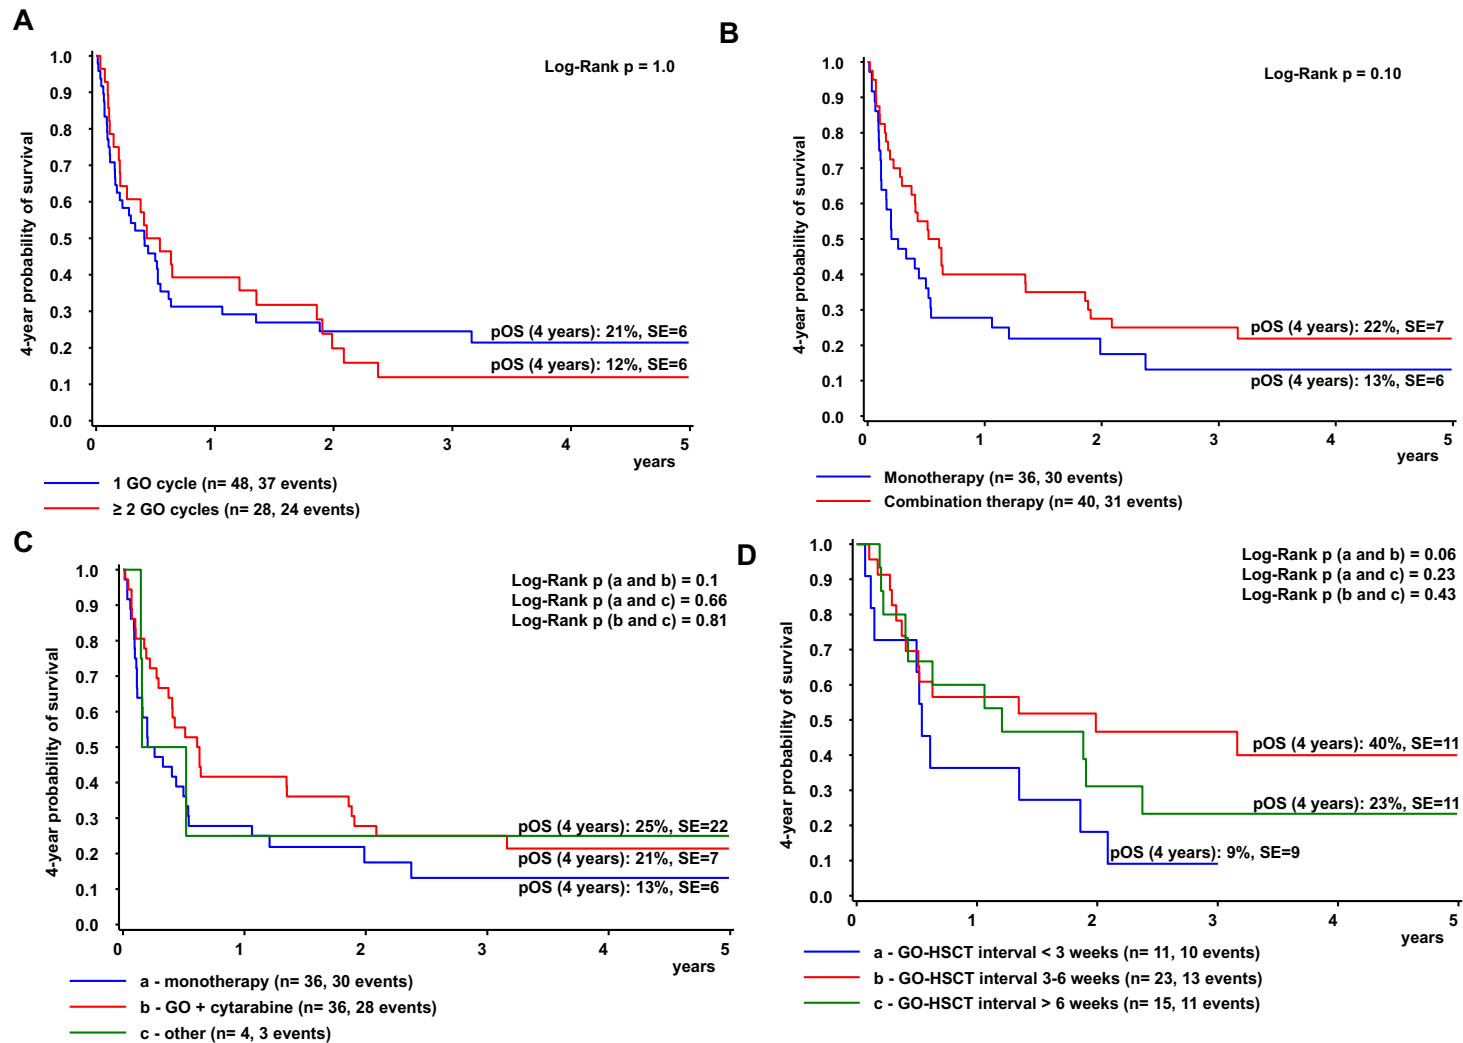

**Figure S3.** (A) 4-year probability of survival based on cycles of treatment. (B) 4-year probability of survival based on monotherapy or combined treatment. (C) 4-year probability of survival based on monotherapy or combined treatment in detail. (D) 4-year probability of survival based on the interval between GO treatment and HSCT. Abbreviations: pOS, probability of overall survival; n, number of patients; HSCT, hematopoietic stem cell transplantation; AML, acute myeloid leukemia; GO, Gemtuzumab Ozogamicin.

## References

1. Zwaan CM, Reinhardt D, Zimmerman M, et al. Salvage treatment for children with refractory first or second relapse of acute myeloid leukaemia with gemtuzumab ozogamicin: results of a phase II study. *Br J Haematol.* 2010;148(5):768-776.
